# Supplementary material for: Transcription Factors Exhibit Differential Conservation in Bacteria with Reduced Genomes
Source: PLoS One. 2016 Jan 14;11(1):e0146901. doi: 10.1371/journal.pone.0146901 (PMC4713081; doi:10.1371/journal.pone.0146901)
Supplement: S2 Table — (XLSX) [file pone.0146901.s002.xlsx]

## Sheet: S2 Table
S2 Table. General data of the genomes used in this work classified by life style
Bacterium	Genome Size	Numbers of Genes	Live style	Numbers of TFs	Frequency Activartors	Frequency Repressors	Frequency Duals	Frequency Global	Frequency NAPs	Fraction Activators	Fraction Repressors	Fraction Dual	Fraction Unknown	Fraction Global	Fraction NAPs
Escherichia coli K 12 substr MG1655	4.63897	4499	Free-living	196	48	65	77	10	4	0.244898	0.331633	0.392857	0.0306122	0.0510204	0.0204082
Yersinia enterocolitica palearctica 105 5R r	4.62181	4206	Free-living	124	24	42	53	10	4	0.193548	0.33871	0.427419	0.0403226	0.0806452	0.0322581
Shewanella loihica PV 4	4.60259	3993	Free-living	75	12	20	40	9	3	0.16	0.266667	0.533333	0.04	0.12	0.04
Alteromonas macleodii English str Channel 673	4.60178	3979	Free-living	72	10	19	41	8	3	0.138889	0.263889	0.569444	0.0277778	0.111111	0.0416667
Alteromonas macleodii str English Channel 615	4.58235	3644	Free-living	71	13	21	34	9	3	0.183099	0.295775	0.478873	0.0422535	0.126761	0.0422535
Escherichia coli BW2952	4.57816	4262	Free-living	183	46	60	71	10	4	0.251366	0.327869	0.387978	0.0327869	0.0546448	0.0218579
Cellvibrio japonicus Ueda107	4.57657	3812	Free-living	57	9	18	28	8	3	0.157895	0.315789	0.491228	0.0350877	0.140351	0.0526316
Stenotrophomonas maltophilia R551 3	4.57397	4134	Free-living	73	14	23	33	6	3	0.191781	0.315068	0.452055	0.0410959	0.0821918	0.0410959
Pseudomonas stutzeri A1501	4.56742	4209	Free-living	71	14	19	35	7	3	0.197183	0.267606	0.492958	0.0422535	0.0985915	0.0422535
Psychromonas ingrahamii 37	4.5596	3863	Free-living	64	5	25	33	8	3	0.078125	0.390625	0.515625	0.015625	0.125	0.046875
Aeromonas veronii B565	4.55178	4170	Free-living	95	18	29	46	10	4	0.189474	0.305263	0.484211	0.0210526	0.105263	0.0421053
Pseudomonas stutzeri ATCC 17588 LMG 11199	4.54793	4314	Free-living	71	13	19	37	7	3	0.183099	0.267606	0.521127	0.028169	0.0985915	0.0422535
Shewanella denitrificans OS217	4.54591	3905	Free-living	69	10	20	37	9	3	0.144928	0.289855	0.536232	0.0289855	0.130435	0.0434783
Stenotrophomonas maltophilia JV3	4.54448	4177	Free-living	73	14	22	35	6	3	0.191781	0.30137	0.479452	0.0273973	0.0821918	0.0410959
Cronobacter sakazakii SP291	4.51878	4286	Free-living	133	26	45	56	10	4	0.195489	0.338346	0.421053	0.0451128	0.075188	0.0300752
Alteromonas macleodii str Deep ecotype	4.48094	4121	Free-living	79	9	26	41	9	3	0.113924	0.329114	0.518987	0.0379747	0.113924	0.0379747
Alteromonas macleodii str Black Sea 11	4.48051	3858	Free-living	73	11	19	42	8	3	0.150685	0.260274	0.575342	0.0136986	0.109589	0.0410959
Salmonella bongori NCTC 12419	4.46011	4054	Free-living	143	32	42	66	10	4	0.223776	0.293706	0.461538	0.020979	0.0699301	0.027972
Alteromonas macleodii str Ionian Sea U7	4.44294	3931	Free-living	74	10	23	38	9	3	0.135135	0.310811	0.513514	0.0405405	0.121622	0.0405405
Providencia stuartii MRSN 2154	4.40211	4196	Free-living	103	14	37	50	10	4	0.135922	0.359223	0.485437	0.0194175	0.0970874	0.038835
Shewanella amazonensis SB2B	4.30614	3785	Free-living	77	13	21	40	9	3	0.168831	0.272727	0.519481	0.038961	0.116883	0.038961
Simiduia agarivorans SA1 DSM 21679	4.30023	3887	Free-living	61	8	19	30	7	3	0.131148	0.311475	0.491803	0.0655738	0.114754	0.0491803
Ferrimonas balearica DSM 9799	4.27916	3947	Free-living	68	12	19	35	9	3	0.176471	0.279412	0.514706	0.0294118	0.132353	0.0441176
Vibrio fischeri ES114	4.27372	3985	Free-living	89	13	29	45	10	4	0.146067	0.325843	0.505618	0.0224719	0.11236	0.0449438
Cronobacter sakazakii ES15	4.26867	4018	Free-living	128	25	41	57	4	4	0.195312	0.320312	0.445312	0.0390625	0.03125	0.03125
Vibrio cholerae MJ 1236	4.23637	3910	Free-living	95	17	30	44	9	4	0.178947	0.315789	0.463158	0.0421053	0.0947368	0.0421053
Acinetobacter baumannii TCDC AB0715	4.21801	4010	Free-living	70	11	26	31	6	3	0.157143	0.371429	0.442857	0.0285714	0.0857143	0.0428571
Pseudomonas stutzeri DSM 10701	4.17412	3888	Free-living	76	14	21	37	7	3	0.184211	0.276316	0.486842	0.0526316	0.0921053	0.0394737
Shimwellia blattae DSM 4481 NBRC 105725	4.15872	4017	Free-living	129	28	38	59	10	4	0.217054	0.294574	0.457364	0.0310078	0.0775194	0.0310078
Acinetobacter oleivorans DR1	4.15254	3963	Free-living	73	14	27	28	6	3	0.191781	0.369863	0.383562	0.0547945	0.0821918	0.0410959
Legionella longbeachae NSW150	4.14916	3739	Free-living	36	5	10	19	7	3	0.138889	0.277778	0.527778	0.0555556	0.194444	0.0833333
Nitrosococcus halophilus Nc 4	4.14526	4087	Free-living	37	8	14	14	5	3	0.216216	0.378378	0.378378	0.027027	0.135135	0.0810811
Thioflavicoccus mobilis 8321	4.13752	3783	Free-living	42	8	11	22	6	3	0.190476	0.261905	0.52381	0.0238095	0.142857	0.0714286
Glaciecola nitratireducens FR1064	4.13423	3720	Free-living	59	9	16	33	8	3	0.152542	0.271186	0.559322	0.0169492	0.135593	0.0508475
Listonella anguillarum M3	4.11789	3882	Free-living	93	18	26	45	9	4	0.193548	0.27957	0.483871	0.0430108	0.0967742	0.0430108
Proteus mirabilis HI4320	4.0999	3862	Free-living	101	17	32	49	10	4	0.168317	0.316832	0.485149	0.029703	0.0990099	0.039604
Erwinia pyrifoliae Ep1 96	4.07285	3852	Free-living	98	16	29	49	9	4	0.163265	0.295918	0.5	0.0408163	0.0918367	0.0408163
Erwinia tasmaniensis Et1 99	4.06786	3804	Free-living	99	17	29	51	10	4	0.171717	0.292929	0.515152	0.020202	0.10101	0.040404
Marinobacter sp BSs20148	4.06386	3944	Free-living	62	10	19	31	7	3	0.16129	0.306452	0.5	0.0322581	0.112903	0.0483871
Halomonas elongata DSM 2581	4.0613	3554	Free-living	69	11	23	33	6	3	0.15942	0.333333	0.478261	0.0289855	0.0869565	0.0434783
Vibrio anguillarum 775	4.05205	3838	Free-living	93	18	27	44	9	4	0.193548	0.290323	0.473118	0.0430108	0.0967742	0.0430108
Vibrio cholerae O1 biovar El Tor str N16961	4.03346	3693	Free-living	93	17	29	44	9	4	0.182796	0.311828	0.473118	0.0322581	0.0967742	0.0430108
Thioalkalivibrio nitratireducens DSM 14787	4.00235	3880	Free-living	45	6	16	20	5	3	0.133333	0.355556	0.444444	0.0666667	0.111111	0.0666667
Marinobacter hydrocarbonoclasticus ATCC 49840	3.98948	3843	Free-living	64	15	15	31	7	3	0.234375	0.234375	0.484375	0.046875	0.109375	0.046875
Thalassolituus oleivorans MIL 1	3.92033	3732	Free-living	60	13	18	27	8	3	0.216667	0.3	0.45	0.0333333	0.133333	0.05
Marinomonas posidonica IVIA Po 181	3.89994	3652	Free-living	67	9	27	29	6	3	0.134328	0.402985	0.432836	0.0298507	0.0895522	0.0447761
Acinetobacter calcoaceticus PHEA 2	3.86253	3674	Free-living	67	10	24	31	6	3	0.149254	0.358209	0.462687	0.0298507	0.0895522	0.0447761
Xanthomonas albilineans GPE PC73	3.8523	3266	Free-living	45	9	12	23	7	3	0.2	0.266667	0.511111	0.0222222	0.155556	0.0666667
Pseudoalteromonas haloplanktis TAC125	3.85027	3619	Free-living	71	11	21	37	8	3	0.15493	0.295775	0.521127	0.028169	0.112676	0.0422535
Proteus mirabilis BB2000	3.84675	3558	Free-living	99	19	29	48	10	4	0.191919	0.292929	0.484848	0.030303	0.10101	0.040404
Erwinia amylovora CFBP1430	3.83383	3803	Free-living	98	17	29	49	9	4	0.173469	0.295918	0.5	0.0306122	0.0918367	0.0408163
Edwardsiella tarda EIB202	3.80417	3719	Free-living	111	28	30	51	10	4	0.252252	0.27027	0.459459	0.018018	0.0900901	0.036036
Morganella morganii subsp morganii KT	3.79954	3624	Free-living	104	18	34	50	10	4	0.173077	0.326923	0.480769	0.0192308	0.0961538	0.0384615
Vibrio cholerae LMA3984 4	3.73872	3442	Free-living	83	15	24	42	9	4	0.180723	0.289157	0.506024	0.0240964	0.108434	0.0481928
Chromohalobacter salexigens DSM 3043	3.69665	3409	Free-living	68	11	22	33	6	3	0.161765	0.323529	0.485294	0.0294118	0.0882353	0.0441176
Allochromatium vinosum DSM 180	3.66907	3366	Free-living	43	8	15	18	6	3	0.186047	0.348837	0.418605	0.0465116	0.139535	0.0697674
Frateuria aurantia DSM 6220	3.60346	3288	Free-living	65	11	23	28	7	3	0.169231	0.353846	0.430769	0.0461538	0.107692	0.0461538
Nitrosococcus oceani ATCC 19707	3.52211	3185	Free-living	36	6	11	17	7	3	0.166667	0.305556	0.472222	0.0555556	0.194444	0.0833333
Legionella pneumophila subsp pneumophila	3.49254	3327	Free-living	34	6	9	18	6	3	0.176471	0.264706	0.529412	0.0294118	0.176471	0.0882353
Tolumonas auensis DSM 9187	3.47129	3292	Free-living	85	12	27	42	10	4	0.141176	0.317647	0.494118	0.0470588	0.117647	0.0470588
Thioalkalivibrio sulfidophilus HL EbGr7	3.46455	3372	Free-living	46	7	16	21	6	3	0.152174	0.347826	0.456522	0.0434783	0.130435	0.0652174
Pseudoxanthomonas spadix BD a59	3.45255	3202	Free-living	53	9	21	21	7	3	0.169811	0.396226	0.396226	0.0377358	0.132075	0.0566038
Pseudoxanthomonas suwonensis 11 1	3.41905	3172	Free-living	42	4	13	24	6	3	0.0952381	0.309524	0.571429	0.0238095	0.142857	0.0714286
Nitrosococcus watsonii C 113	3.37329	3245	Free-living	36	6	14	15	6	3	0.166667	0.388889	0.416667	0.0277778	0.166667	0.0833333
Methylococcus capsulatus Bath	3.30456	3052	Free-living	33	5	10	16	6	3	0.151515	0.30303	0.484848	0.0606061	0.181818	0.0909091
Alkalilimnicola ehrlichii MLHE 1	3.27594	2940	Free-living	44	2	20	20	6	3	0.0454545	0.454545	0.454545	0.0454545	0.136364	0.0681818
Acidithiobacillus caldus SM 1	3.2376	3235	Free-living	42	5	20	15	5	3	0.119048	0.47619	0.357143	0.047619	0.119048	0.0714286
Acidithiobacillus ferrivorans SS3	3.20755	3335	Free-living	44	8	15	18	5	3	0.181818	0.340909	0.409091	0.0681818	0.113636	0.0681818
Methylophaga nitratireducenticrescens	3.13719	3096	Free-living	54	10	16	25	8	3	0.185185	0.296296	0.462963	0.0555556	0.148148	0.0555556
Alcanivorax borkumensis SK2	3.12014	2806	Free-living	55	7	17	28	7	3	0.127273	0.309091	0.509091	0.0545455	0.127273	0.0545455
Psychrobacter cryohalolentis K5	3.1011	2581	Free-living	51	6	22	21	6	3	0.117647	0.431373	0.411765	0.0392157	0.117647	0.0588235
Acidithiobacillus ferrooxidans ATCC 23270	2.9824	3303	Free-living	41	6	14	19	6	3	0.146341	0.341463	0.463415	0.0487805	0.146341	0.0731707
Kangiella koreensis DSM 16069	2.85207	2697	Free-living	46	9	15	21	8	3	0.195652	0.326087	0.456522	0.0217391	0.173913	0.0652174
Idiomarina loihiensis GSL 199	2.83976	2717	Free-living	61	8	20	29	9	4	0.131148	0.327869	0.47541	0.0655738	0.147541	0.0655738
Methylophaga frappieri	2.74529	2748	Free-living	42	8	11	21	8	3	0.190476	0.261905	0.5	0.047619	0.190476	0.0714286
Xylella fastidiosa 9a5c	2.73175	2905	Free-living	35	3	17	14	5	3	0.0857143	0.485714	0.4	0.0285714	0.142857	0.0857143
Mannheimia haemolytica D174	2.7022	2814	Free-living	60	6	21	32	9	4	0.1	0.35	0.533333	0.0166667	0.15	0.0666667
Gallibacterium anatis UMN179	2.69414	2587	Free-living	62	7	26	27	9	3	0.112903	0.419355	0.435484	0.0322581	0.145161	0.0483871
Halorhodospira halophila SL1	2.67845	2493	Free-living	33	3	15	14	5	3	0.0909091	0.454545	0.424242	0.030303	0.151515	0.0909091
Cycloclasticus zancles 7 ME	2.65543	2623	Free-living	35	6	11	16	6	3	0.171429	0.314286	0.457143	0.0571429	0.171429	0.0857143
Psychrobacter arcticus 273 4	2.6507	2211	Free-living	40	6	13	18	4	3	0.15	0.325	0.45	0.075	0.1	0.075
Halothiobacillus neapolitanus c2	2.58289	2465	Free-living	43	8	12	21	6	3	0.186047	0.27907	0.488372	0.0465116	0.139535	0.0697674
Thiomicrospira crunogena XCL 2	2.42773	2259	Free-living	31	4	10	16	6	3	0.129032	0.322581	0.516129	0.0322581	0.193548	0.0967742
Bibersteinia trehalosi USDA ARS USMARC 192	2.40785	2325	Free-living	55	5	21	27	9	4	0.0909091	0.381818	0.490909	0.0363636	0.163636	0.0727273
Pasteurella multocida 36950	2.34952	2202	Free-living	57	4	20	32	8	3	0.0701754	0.350877	0.561404	0.0175439	0.140351	0.0526316
Haemophilus parasuis ZJ0906	2.32474	2289	Free-living	53	4	20	26	9	3	0.0754717	0.377358	0.490566	0.0566038	0.169811	0.0566038
Actinobacillus succinogenes 130Z	2.31966	2199	Free-living	60	7	21	30	8	3	0.116667	0.35	0.5	0.0333333	0.133333	0.05
Mannheimia succiniciproducens MBEL55E	2.31408	2449	Free-living	63	8	21	32	9	4	0.126984	0.333333	0.507937	0.031746	0.142857	0.0634921
Aggregatibacter actinomycetemcomitans D7S 1	2.30907	2334	Free-living	57	2	25	28	9	4	0.0350877	0.438596	0.491228	0.0350877	0.157895	0.0701754
Haemophilus somnus 2336	2.26386	2065	Free-living	54	4	23	26	7	3	0.0740741	0.425926	0.481481	0.0185185	0.12963	0.0555556
Actinobacillus pleuropneumoniae serovar 3 str JL03	2.24206	2147	Free-living	59	6	24	28	9	4	0.101695	0.40678	0.474576	0.0169492	0.152542	0.0677966
Coxiella burnetii Dugway 5J108 111	2.21294	2362	Free-living	26	3	7	15	4	3	0.115385	0.269231	0.576923	0.0384615	0.153846	0.115385
Aggregatibacter actinomycetemcomitans ANH9381	2.13681	2142	Free-living	56	3	24	27	9	4	0.0535714	0.428571	0.482143	0.0357143	0.160714	0.0714286
Haemophilus influenzae Rd KW20	1.83014	1690	Free-living	49	4	15	28	8	3	0.0816327	0.306122	0.571429	0.0408163	0.163265	0.0612245
Haemophilus ducreyi 35000HP	1.69895	1838	Free-living	33	0	11	21	8	3	0	0.333333	0.636364	0.030303	0.242424	0.0909091
Sodalis glossinidius str morsitans	4.2925	2607	Host-restricted symbiont or pathogen	77	14	26	36	9	4	0.181818	0.337662	0.467532	0.012987	0.116883	0.0519481
Candidatus Hamiltonella defensa 5AT Acyrthosiphon pisum	2.1692	2196	Host-restricted symbiont or pathogen	20	3	8	8	3	3	0.15	0.4	0.4	0.05	0.15	0.15
Francisella tularensis holarctica LVS	1.89599	1744	Host-restricted symbiont or pathogen	19	2	9	6	1	1	0.105263	0.473684	0.315789	0.105263	0.0526316	0.0526316
Francisella tularensis mediasiatica FSC147	1.89389	1453	Host-restricted symbiont or pathogen	21	4	9	6	1	1	0.190476	0.428571	0.285714	0.0952381	0.047619	0.047619
Francisella tularensis tularensis FSC198	1.89262	1607	Host-restricted symbiont or pathogen	20	3	9	6	1	1	0.15	0.45	0.3	0.1	0.05	0.05
Dichelobacter nodosus VCS1703A	1.38935	1334	Host-restricted symbiont or pathogen	17	3	5	8	2	2	0.176471	0.294118	0.470588	0.0588235	0.117647	0.117647
Serratia symbiotica str Cinara cedri	1.76276	711	Obligate symbiont or pathogen	14	0	4	9	4	4	0	0.285714	0.642857	0.0714286	0.285714	0.285714
Secondary endosymbiont of Ctenarytaina eucalypti	1.44114	963	Obligate symbiont or pathogen	15	1	5	8	3	1	0.0666667	0.333333	0.533333	0.0666667	0.2	0.0666667
Secondary endosymbiont of Heteropsylla cubana	1.1216	620	Obligate symbiont or pathogen	7	1	2	3	1	1	0.142857	0.285714	0.428571	0.142857	0.142857	0.142857
Candidatus Vesicomyosocius okutanii HA	1.02215	975	Obligate symbiont or pathogen	12	1	3	7	2	2	0.0833333	0.25	0.583333	0.0833333	0.166667	0.166667
Wigglesworthia glossinidia str endosymbiont of glossina brevipalpis	0.703004	641	Obligate symbiont or pathogen	11	1	5	4	2	2	0.0909091	0.454545	0.363636	0.0909091	0.181818	0.181818
Baumannia cicadellinicola str Hc Homalodisca coagulata	0.686194	657	Obligate symbiont or pathogen	12	1	5	5	2	2	0.0833333	0.416667	0.416667	0.0833333	0.166667	0.166667
Buchnera aphidicola APS Acyrthosiphon pisum	0.655725	608	Obligate symbiont or pathogen	8	0	2	6	3	4	0	0.25	0.75	0	0.375	0.5
Buchnera aphidicola Sg Schizaphis graminum	0.641454	581	Obligate symbiont or pathogen	8	0	2	6	2	3	0	0.25	0.75	0	0.25	0.375
Buchnera aphidicola Bp Baizongia pistaciae	0.618379	542	Obligate symbiont or pathogen	5	0	2	3	0	1	0	0.4	0.6	0	0	0.2
Buchnera aphidicola Cinara tujafilina	0.444925	394	Obligate symbiont or pathogen	5	0	2	3	1	1	0	0.4	0.6	0	0.2	0.2
Buchnera aphidicola BCc	0.422434	392	Obligate symbiont or pathogen	5	0	1	4	2	2	0	0.2	0.8	0	0.4	0.4
Candidatus Portiera aleyrodidarum BT B	0.351658	296	Tiny-genome symbiont	0	0	0	0	0	0	0	0	0	0	0	0
Candidatus Carsonella ruddii PV	0.159662	213	Tiny-genome symbiont	0	0	0	0	0	0	0	0	0	0	0	0
