# Supplementary material for: Transcription Factors Exhibit Differential Conservation in Bacteria with Reduced Genomes
Source: PLoS One. 2016 Jan 14;11(1):e0146901. doi: 10.1371/journal.pone.0146901 (PMC4713081; doi:10.1371/journal.pone.0146901)
Supplement: S3 Table — (XLSX) [file pone.0146901.s003.xlsx]

## Sheet: S3 Table
S3 Table. Classification of biological function of all the orthologous genes (to E. coli) using the parental categories of Gene Ontology.
We used the software DAVID for functional annotation. In the case of E. coli, we identified 9 parental categories.
Escherichia coli K 12 substr MG1655	Yersinia enterocolitica subsp. palearctica 105.5R(r)	Shewanella loihica PV-4	Alteromonas macleodii str. 'English Channel 673'	Alteromonas macleodii str. 'English Channel 615'	Escherichia coli BW2952	Cellvibrio japonicus Ueda107	Stenotrophomonas maltophilia R551-3	Pseudomonas stutzeri A1501	Psychromonas ingrahamii 37	Aeromonas veronii B565	Pseudomonas stutzeri ATCC 17588 = LMG 11199	Shewanella denitrificans OS217	Stenotrophomonas maltophilia JV3	Cronobacter sakazakii SP291	Alteromonas macleodii str. 'Deep ecotype'	Alteromonas macleodii str. 'Black Sea 11'	Salmonella bongori NCTC 12419	Alteromonas macleodii str. 'Ionian Sea U7'	Providencia stuartii MRSN 2154	Shewanella amazonensis SB2B	Simiduia agarivorans SA1 = DSM 21679	Ferrimonas balearica DSM 9799	Vibrio fischeri ES114	Cronobacter sakazakii ES15	Vibrio cholerae MJ-1236	Acinetobacter baumannii TCDC-AB0715	Pseudomonas stutzeri DSM 10701	Shimwellia blattae DSM 4481 = NBRC 105725	Acinetobacter oleivorans DR1	Legionella longbeachae NSW150	Nitrosococcus halophilus Nc 4	Thioflavicoccus mobilis 8321	Glaciecola nitratireducens FR1064	Listonella anguillarum M3	Proteus mirabilis HI4320	Erwinia pyrifoliae Ep1/96	Erwinia tasmaniensis Et1/99	Marinobacter sp. BSs20148	Halomonas elongata DSM 2581	Vibrio anguillarum 775	Vibrio cholerae O1 biovar El Tor str. N16961	Thioalkalivibrio nitratireducens DSM 14787	Marinobacter hydrocarbonoclasticus ATCC 49840	Thalassolituus oleivorans MIL-1	Marinomonas posidonica IVIA-Po-181	Acinetobacter calcoaceticus PHEA-2	Xanthomonas albilineans GPE PC73	Pseudoalteromonas haloplanktis TAC125	Proteus mirabilis BB2000
metabolic process	metabolic process	metabolic process	metabolic process	metabolic process	metabolic process	metabolic process	metabolic process	metabolic process	metabolic process	metabolic process	metabolic process	metabolic process	metabolic process	metabolic process	metabolic process	metabolic process	metabolic process	metabolic process	metabolic process	metabolic process	metabolic process	metabolic process	metabolic process	metabolic process	metabolic process	metabolic process	metabolic process	metabolic process	metabolic process	metabolic process	metabolic process	metabolic process	metabolic process	metabolic process	metabolic process	metabolic process	metabolic process	metabolic process	metabolic process	metabolic process	metabolic process	metabolic process	metabolic process	metabolic process	metabolic process	metabolic process	metabolic process	metabolic process	metabolic process
cellular process	cellular process	cellular process	cellular process	cellular process	cellular process	cellular process	cellular process	cellular process	cellular process	cellular process	cellular process	cellular process	cellular process	cellular process	cellular process	cellular process	cellular process	cellular process	cellular process	cellular process	cellular process	cellular process	cellular process	cellular process	cellular process	cellular process	cellular process	cellular process	cellular process	cellular process	cellular process	cellular process	cellular process	cellular process	cellular process	cellular process	cellular process	cellular process	cellular process	cellular process	cellular process	cellular process	cellular process	cellular process	cellular process	cellular process	cellular process	cellular process	cellular process
cellular component organization	cellular component organization	cellular component organization	cellular component organization	cellular component organization	cellular component organization	cellular component organization	cellular component organization	cellular component organization	cellular component organization	cellular component organization	cellular component organization	cellular component organization	cellular component organization	cellular component organization	cellular component organization	cellular component organization	cellular component organization	cellular component organization	cellular component organization	cellular component organization	cellular component organization	cellular component organization	cellular component organization	cellular component organization	cellular component organization	cellular component organization	cellular component organization	cellular component organization	cellular component organization	cellular component organization	cellular component organization	cellular component organization	cellular component organization	cellular component organization	cellular component organization	cellular component organization	cellular component organization	cellular component organization	cellular component organization	cellular component organization	cellular component organization	cellular component organization	cellular component organization	cellular component organization	cellular component organization	cellular component organization	cellular component organization	cellular component organization	cellular component organization
locomotion	locomotion	locomotion	locomotion	locomotion	locomotion	locomotion	locomotion	locomotion	locomotion	locomotion	locomotion	locomotion	locomotion	locomotion	locomotion	locomotion	locomotion	locomotion	locomotion	locomotion	locomotion	locomotion	locomotion	locomotion	locomotion	cellular component biogenesis	locomotion	cellular component biogenesis	cellular component biogenesis	locomotion	locomotion	locomotion	locomotion	locomotion	locomotion	locomotion	locomotion	locomotion	locomotion	locomotion	locomotion	cellular component biogenesis	locomotion	locomotion	locomotion	cellular component biogenesis	locomotion	locomotion	locomotion
cellular component biogenesis	cellular component biogenesis	cellular component biogenesis	cellular component biogenesis	cellular component biogenesis	cellular component biogenesis	cellular component biogenesis	cellular component biogenesis	cellular component biogenesis	cellular component biogenesis	cellular component biogenesis	cellular component biogenesis	cellular component biogenesis	cellular component biogenesis	cellular component biogenesis	cellular component biogenesis	cellular component biogenesis	cellular component biogenesis	cellular component biogenesis	cellular component biogenesis	cellular component biogenesis	cellular component biogenesis	cellular component biogenesis	cellular component biogenesis	cellular component biogenesis	cellular component biogenesis	response to stimulus	cellular component biogenesis	response to stimulus	response to stimulus	cellular component biogenesis	cellular component biogenesis	cellular component biogenesis	cellular component biogenesis	cellular component biogenesis	cellular component biogenesis	cellular component biogenesis	cellular component biogenesis	cellular component biogenesis	cellular component biogenesis	cellular component biogenesis	cellular component biogenesis	response to stimulus	cellular component biogenesis	cellular component biogenesis	cellular component biogenesis	response to stimulus	cellular component biogenesis	cellular component biogenesis	cellular component biogenesis
response to stimulus	response to stimulus	response to stimulus	response to stimulus	response to stimulus	response to stimulus	response to stimulus	response to stimulus	response to stimulus	response to stimulus	response to stimulus	response to stimulus	response to stimulus	response to stimulus	response to stimulus	response to stimulus	response to stimulus	response to stimulus	response to stimulus	response to stimulus	response to stimulus	response to stimulus	response to stimulus	response to stimulus	response to stimulus	response to stimulus		response to stimulus	localization		response to stimulus	response to stimulus	response to stimulus	response to stimulus	response to stimulus	response to stimulus	response to stimulus	response to stimulus	response to stimulus	response to stimulus	response to stimulus	response to stimulus		response to stimulus	response to stimulus	response to stimulus		response to stimulus	response to stimulus	response to stimulus
localization	localization		biological regulation	biological regulation	localization					localization		biological regulation		localization	biological regulation	biological regulation	localization	biological regulation	localization	biological regulation			localization	localization	localization			establishment of localization						localization	localization	localization	localization	localization	localization	localization	localization		localization	localization	localization			biological regulation	localization
establishment of localization	establishment of localization				establishment of localization					establishment of localization				establishment of localization			establishment of localization						biological regulation	establishment of localization	biological regulation									establishment of localization	biological regulation	establishment of localization	establishment of localization		establishment of localization	biological regulation	establishment of localization		biological regulation	biological regulation	biological regulation
biological regulation					biological regulation									biological regulation			biological regulation							biological regulation										biological regulation		biological regulation	biological regulation
Sodalis glossinidius, Strain morsitans	F. tularensis holarctica LVS	F. tularensis mediasiatica FSC147	Francisella Tularensis, subspecies tularensis, Strain FSC198	Serratia symbiotica, Strain Cinara cedri	Dichelobacter nodosus, Strain VCS1703A
metabolic process	metabolic process	metabolic process	metabolic process	metabolic process	metabolic process
cellular process	cellular process	cellular process	cellular process	cellular process	cellular process
cellular component organization	cellular component organization	cellular component organization	cellular component organization	cellular component organization	cellular component organization
locomotion	cellular component biogenesis	cellular component biogenesis	cellular component biogenesis	cellular component biogenesis	cellular component biogenesis
cellular component biogenesis	response to stimulus	response to stimulus	response to stimulus	response to stimulus	response to stimulus
response to stimulus
localization
biological regulation
Candidatus Hamiltonella defensa, Strain 5AT	secondary endosymbiont of Ctenarytaina eucalypti	secondary endosymbiont of Heteropsylla cubana	Candidatus vesicomyosocius okutanii, Strain okutanii HA	Wiggleswonnia glossinidia, strain endosymbiont of glossina brevipalpis	Baumannia cicadellinicola, Strain str. Hc	Buchnera aphidicola, Strain APS	Buchnera aphidicola, Strain Sg	Buchnera aphidicola, Strain Bp	Buchnera aphidicola, Strain (Cinara tujafilina)	Buchnera aphidicola, Strain BCc
metabolic process	metabolic process	metabolic process	metabolic process	metabolic process	metabolic process	metabolic process	metabolic process	metabolic process	metabolic process	metabolic process
cellular process	cellular process	cellular process	cellular process	cellular process	cellular process	cellular process	cellular process	cellular process	cellular process	cellular process
cellular component biogenesis	cellular component organization	cellular component organization	cellular component organization	cellular component organization	cellular component organization	cellular component organization	response to stimulus	response to stimulus	response to stimulus	response to stimulus
response to stimulus	cellular component biogenesis	cellular component biogenesis	cellular component biogenesis	locomotion	cellular component biogenesis	locomotion	locomotion	locomotion	locomotion
	response to stimulus	response to stimulus	response to stimulus	cellular component biogenesis	response to stimulus	cellular component biogenesis	cellular component biogenesis
				response to stimulus		response to stimulus	cellular component organization
C. Portiera aleyrodidarum BT-B-HRs	C. Carsonella ruddii PV
metabolic process	metabolic process
cellular process	cellular process
[truncated: 45 more columns]
